# Supplementary material for: Electrochemically induced iodine migration in mixed halide perovskites: suppression through chloride insertion
Source: Royal Society of Chemistry journal article supplement (doi:10.1039/d0cc06217k), 2020-11-23
Supplement: d0cc06217k1.pdf [file d0cc06217k1.pdf]

## Electronic Supplementary Information (ESI)

### Electrochemically Induced Iodine Migration in Mixed Halide Perovskites: Suppression through Chloride Insertion

Junsang Cho<sup>1</sup>, Jeffrey T. DuBose<sup>1,2</sup>, Preethi S. Mathew<sup>1,2</sup>, and Prashant V. Kamat<sup>1,2,3\*</sup>

<sup>1</sup>Radiation Laboratory, <sup>2</sup>Department of Chemistry and Biochemistry, and <sup>3</sup>Department of Chemical and Biomolecular Engineering

University of Notre Dame

Notre Dame, Indiana 46556, United States

---

Corresponding Author: [pkamat@nd.edu](mailto:pkamat@nd.edu)

## Experimental Methods

### Materials

All chemicals were used as acquired without additional purification. Methylammonium chloride (MACl, Sigma Aldrich), methylammonium bromide (MABr, Greatcell Solar), methylammonium iodide (MAI, Greatcell Solar), lead chloride (PbCl<sub>2</sub>, 99.99%, Sigma-Aldrich), lead bromide (PbBr<sub>2</sub>, 99.99%, Sigma-Aldrich), lead iodide (PbI<sub>2</sub>, 99.99%, 10 mesh bead, Alfa-Aesar), diethyl ether (anhydrous 99.8%, Sigma-Aldrich), dimethylformamide (DMF, anhydrous 99.8%, Sigma-Aldrich), dimethyl sulfoxide (DMSO, anhydrous 99.9%, Sigma-Aldrich), fluorine-doped tin oxide conducting glass (FTO, Pilkington glass).

### Preparation of Triple-Halide (Cl/Br/I) Perovskite Films

The triple-halide (Cl/Br/I) perovskite films were prepared by following the previously reported literature precedence.<sup>1-3</sup> The preparation of perovskite films was carried out in a glovebox (< 10 ppm H<sub>2</sub>O) unless otherwise stated. Square-shaped FTO substrates (2.5 cm × 2.5 cm) were used for fabricating the perovskite films. The triple-halide perovskite films with a chemical formula of MAPb(Cl<sub>x</sub>Br<sub>0.5(1-x)</sub>I<sub>0.5(1-x)</sub>)<sub>3</sub>, wherein *x* is Cl concentration, were prepared by dissolving stoichiometric amount of precursors of PbX<sub>2</sub> (PbCl<sub>2</sub> + PbBr<sub>2</sub> + PbI<sub>2</sub>) and MAX (MACl + MABr + MAI) in mixed anhydrous DMF:DMSO solvents at a volume ratio of 4:1 to make a 0.6 M (Pb<sup>2+</sup>) precursor solution. The stoichiometric ratio of halide precursors (Cl/Br/I) was systematically varied in the Cl concentration (*x*) range of 0–10 % while maintain the equimolar ratio of Br/I = 1:1. The mixed precursor solutions were vigorously stirred for 1 hr at room temperature in glovebox until the solution became transparent. The precursor solutions were subsequently syringe-filtered through polytetrafluoroethylene membrane filter (0.2 μm pore size, G8549141, Whatman). A 50 μL of precursor solution was statically applied onto the FTO substrate followed by spin-casting at 4000 rpm for 25 s with an acceleration of 1200 rpm. A 0.5 mL of diethyl ether was rapidly injected as antisolvent at 10 s after spinning. The films were transferred to a preheated hot plate and treated at 100 °C for 5 minutes. The films were then taken out from the hot plate, cooled down at room temperature, and stored in the glovebox until further use.

### Electrochemical measurements

Electrochemical measurements were performed with a Gamry potentiostat in a standard three-electrode setup in which the FTO/perovskite electrodes served as the working electrode, a Pt mesh (1 cm<sup>2</sup>) as the counterelectrode (cleaned by “Piranha solution”, water, and finally DCM), and a Ag/AgCl wire as a pseudo-reference electrode. The Ag/AgCl pseudo-reference electrode was prepared by depositing AgCl on Ag wire surface. Calibration of the pseudoreference electrode was performed by measuring the formal potential of the ferrocene/ferrocenium redox couple reaction in DCM (0.001 M ferrocene and 0.01 M Bu<sub>4</sub>NPF<sub>6</sub>)

with a scan rate of  $50 \text{ mV s}^{-1}$ . The formal potential was determined to be  $E = 0.37 \pm 0.05 \text{ V}$  with respect to our Ag/AgCl electrode.<sup>1,4</sup> The electrochemical cells were assembled in ambient conditions and then purged with nitrogen for 10 minutes to ensure inert conditions in the assembled cells.

### Steady-State Absorption Measurements

Steady-state absorption measurements were carried out using a Varian Cary 50 bio spectrophotometer in the wavelength of 450–750 nm. The difference absorption ( $\Delta A$ ) spectra were obtained by subtracting the spectrum at 0 s as a reference from the spectra acquired at later time. Spectroelectrochemical measurements were performed by recording the steady-state absorption spectra under potentiostatic (chronoamperometry) and potentiodynamic (linear sweep voltammetry) conditions.

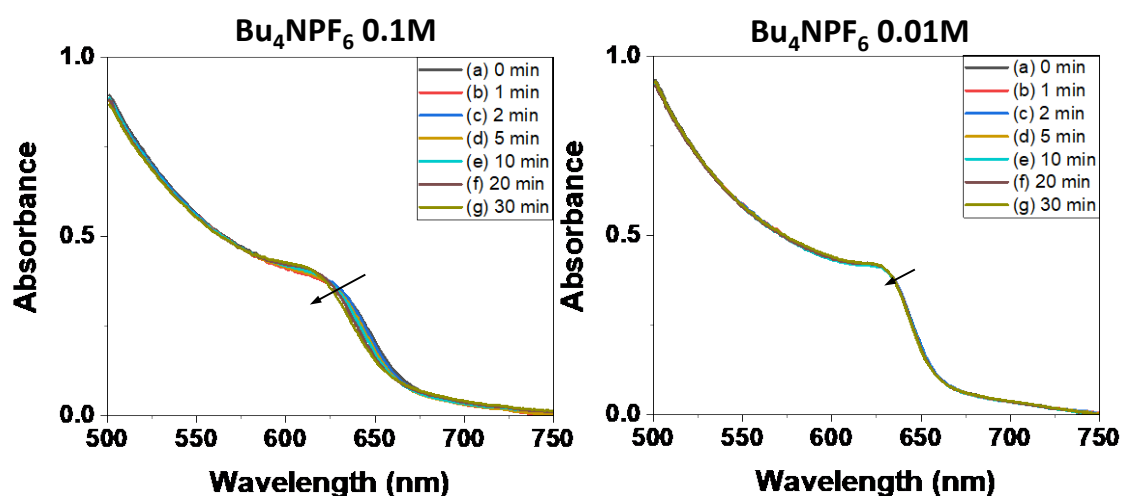

**Fig. S1** (A,B) Absorption changes of mixed halide perovskite films with 0% Cl on FTO upon immersing the films in Bu<sub>4</sub>NPF<sub>6</sub>/DCM electrolyte with different electrolyte concentration of 0.1 M (A) and 0.01 M (B).

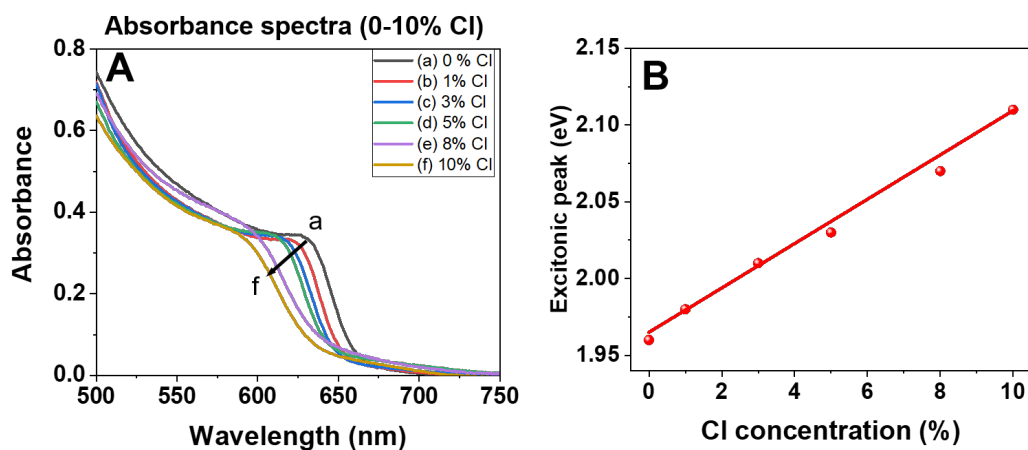

**Fig. S2** (A) Absorbance spectra of mixed halide perovskites films on FTO with different Cl concentration from 0-10% (a-f). **(B)** The excitonic peak dependence of mixed halide perovskite film  $\text{MAPb}(\text{Cl}_x\text{Br}_{0.5(1-x)}\text{I}_{0.5(1-x)})_3$  containing different Cl concentration. The excitonic peak which corresponds to bandgap shows a shift of 0.15 eV as we increase Cl concentration from 0 -10%.

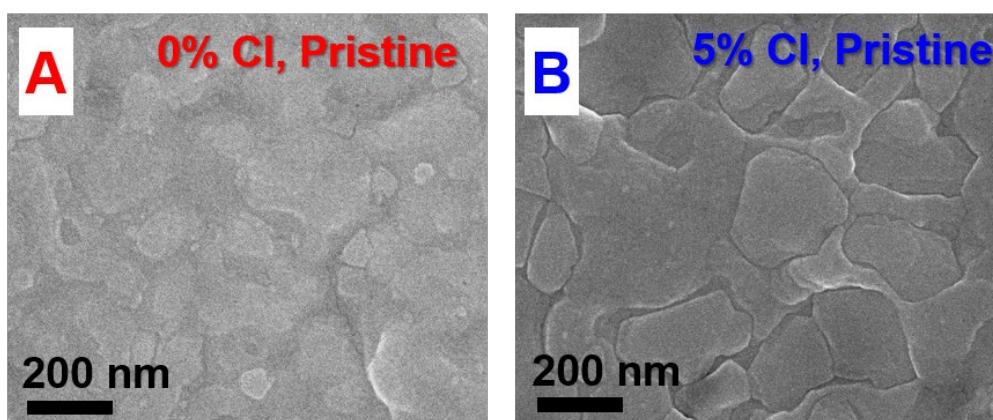

**Fig. S3** SEM images of  $\text{MAPb}(\text{Cl}_x\text{Br}_{0.5(1-x)}\text{I}_{0.5(1-x)})_3$  film (A) with 0% Cl and (B) with 5% Cl deposited on FTO glass before subjecting to electrochemical treatment (pristine films).

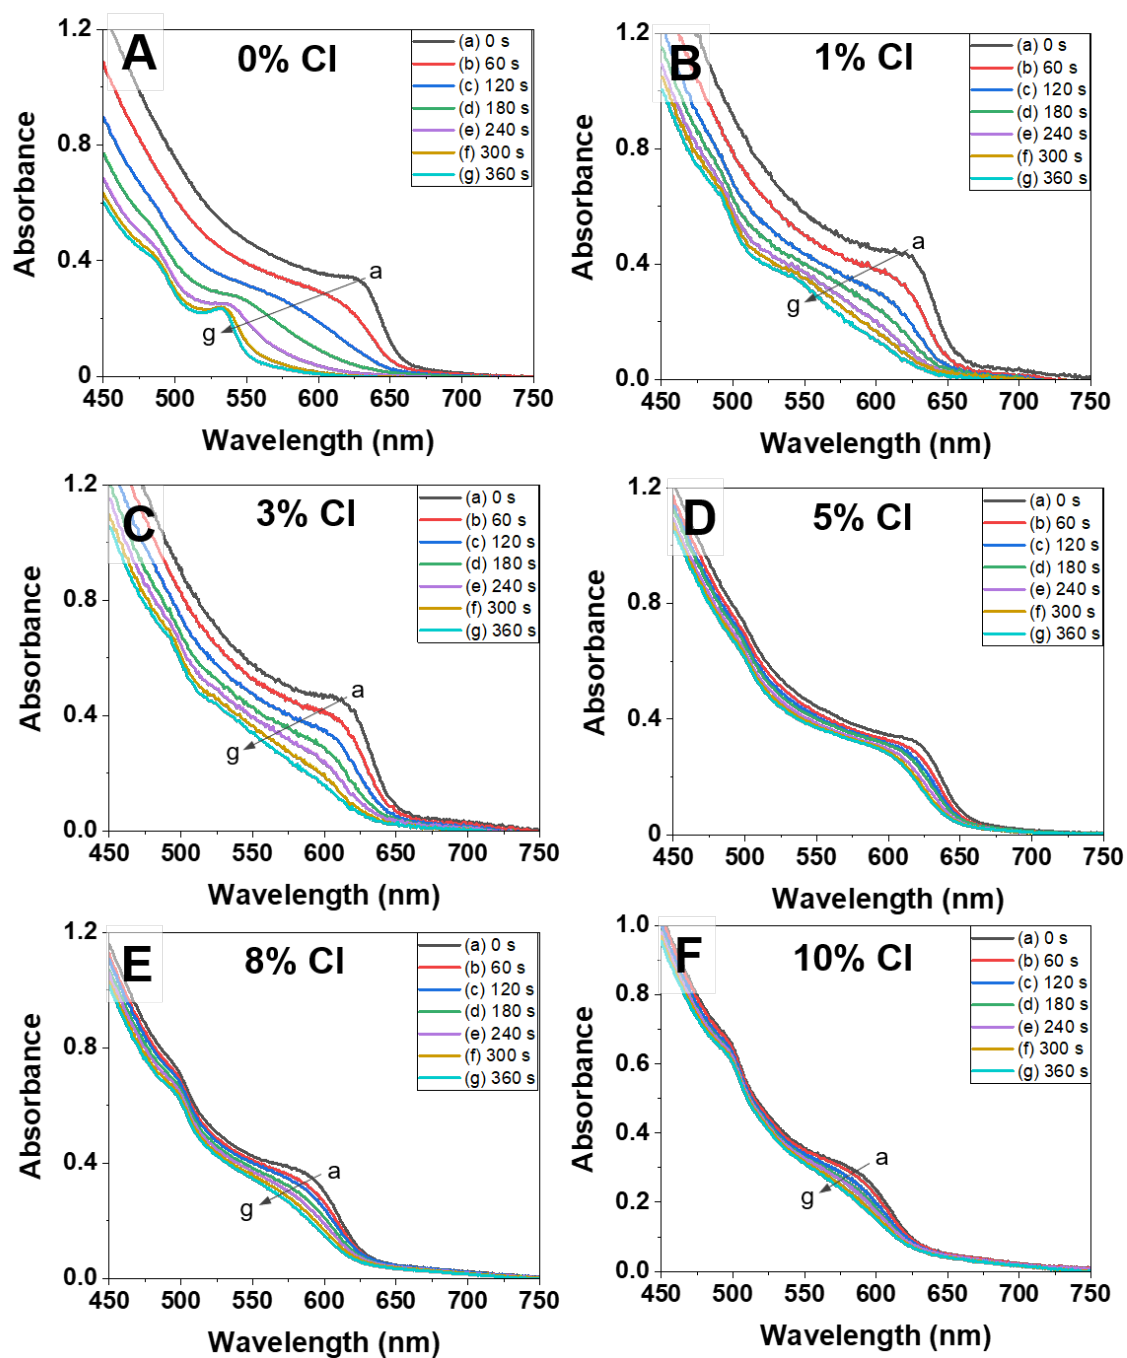

**Fig. S4** (A-F) Absorbance changes recorded for the FTO/MAPb(Cl<sub>x</sub>Br<sub>0.5(1-x)</sub>)<sub>3</sub> films with different Cl concentration of 0% Cl (A), 1% Cl (B), 3% Cl (C), 5% Cl (D), 8% Cl (E), and 10% Cl (F) during potentiostatic treatment at anodic bias of 1.0 V versus Ag/AgCl in 0.01 M Bu<sub>4</sub>NPF<sub>6</sub>/DCM electrolyte with different treatment time from 0-360 s (a-g).

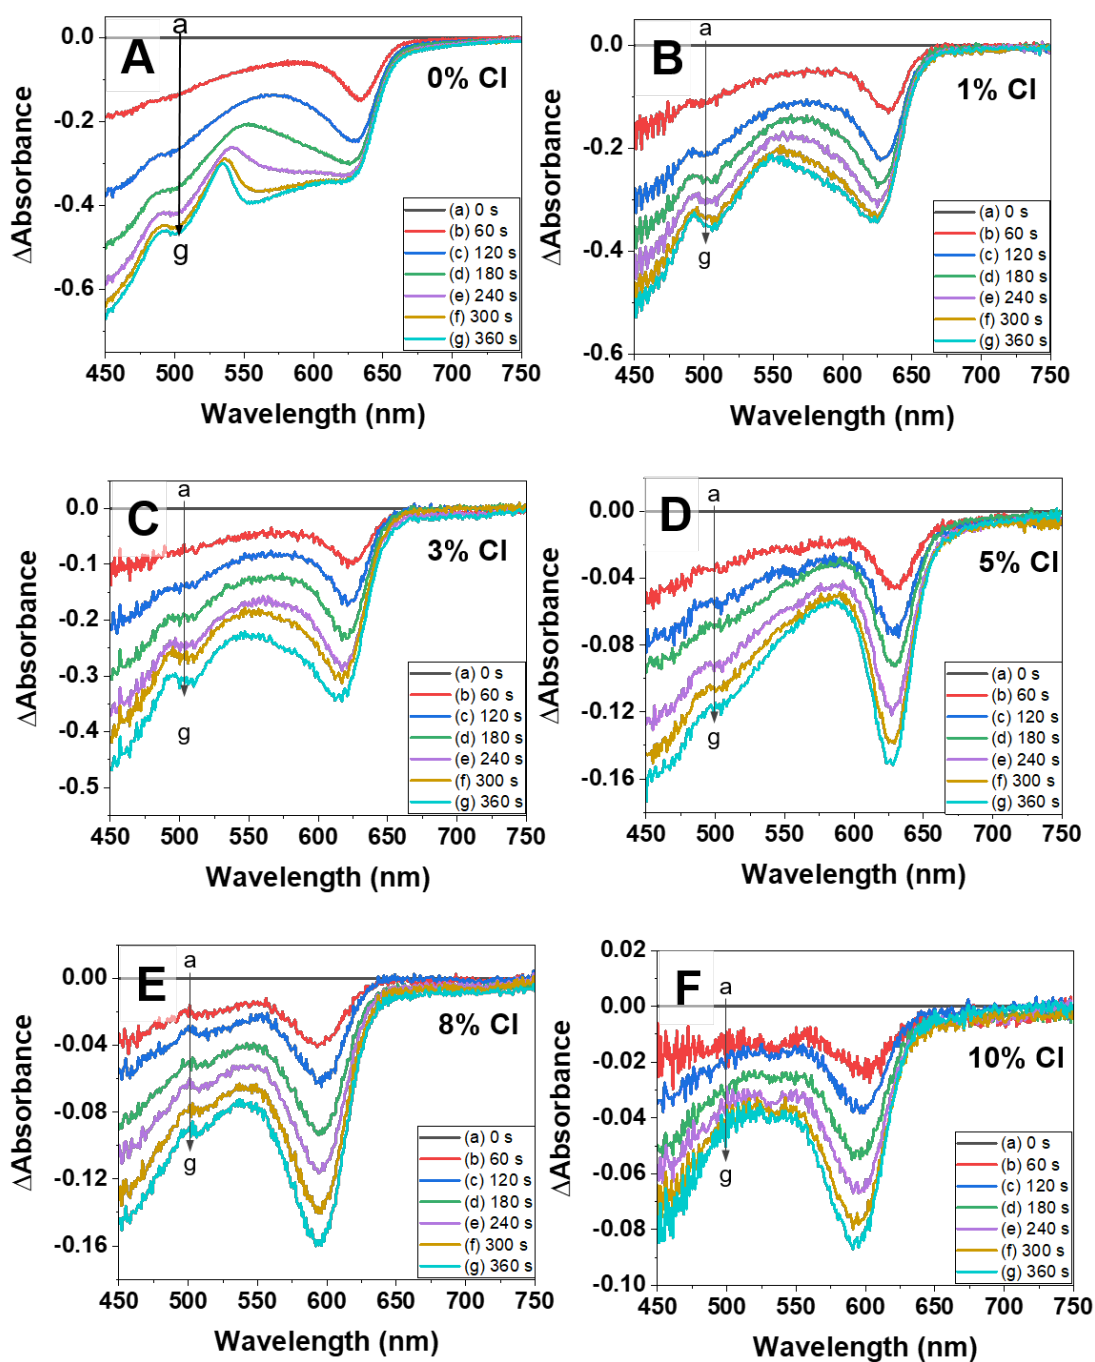

**Fig. S5** (A-F) Difference absorption spectra recorded for the FTO/ MAPb(Cl<sub>x</sub>Br<sub>0.5(1-x)</sub>)<sub>0.5(1-x)</sub><sub>3</sub> films with different Cl concentration of 0% Cl (A), 1% Cl (B), 3% Cl (C), 5% Cl (D), 8% Cl (E), 10% Cl (F) under anodic bias of 1.0 V versus Ag/AgCl in 0.01 M Bu<sub>4</sub>NPF<sub>6</sub>/DCM electrolyte with different treatment time from 0-360 s (a-g). The absorption spectrum at 0s serves as a reference to obtain the difference absorption spectra.

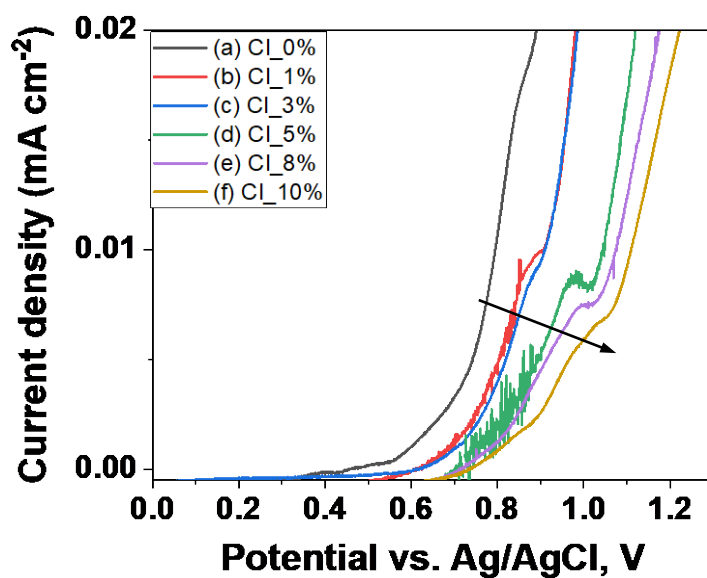

**Fig. S6** Magnified linear sweep voltammograms acquired for the FTO/MAPb(Cl<sub>x</sub>Br<sub>0.5(1-x)</sub>I<sub>0.5(1-x)</sub>)<sub>3</sub> films with different Cl concentration from 0-10% (a-f) with a scan rate of 5 mV/s in the voltage range of 0-1.44 V vs Ag/AgCl in 0.01 M Bu<sub>4</sub>NPF<sub>6</sub>/DCM electrolyte.

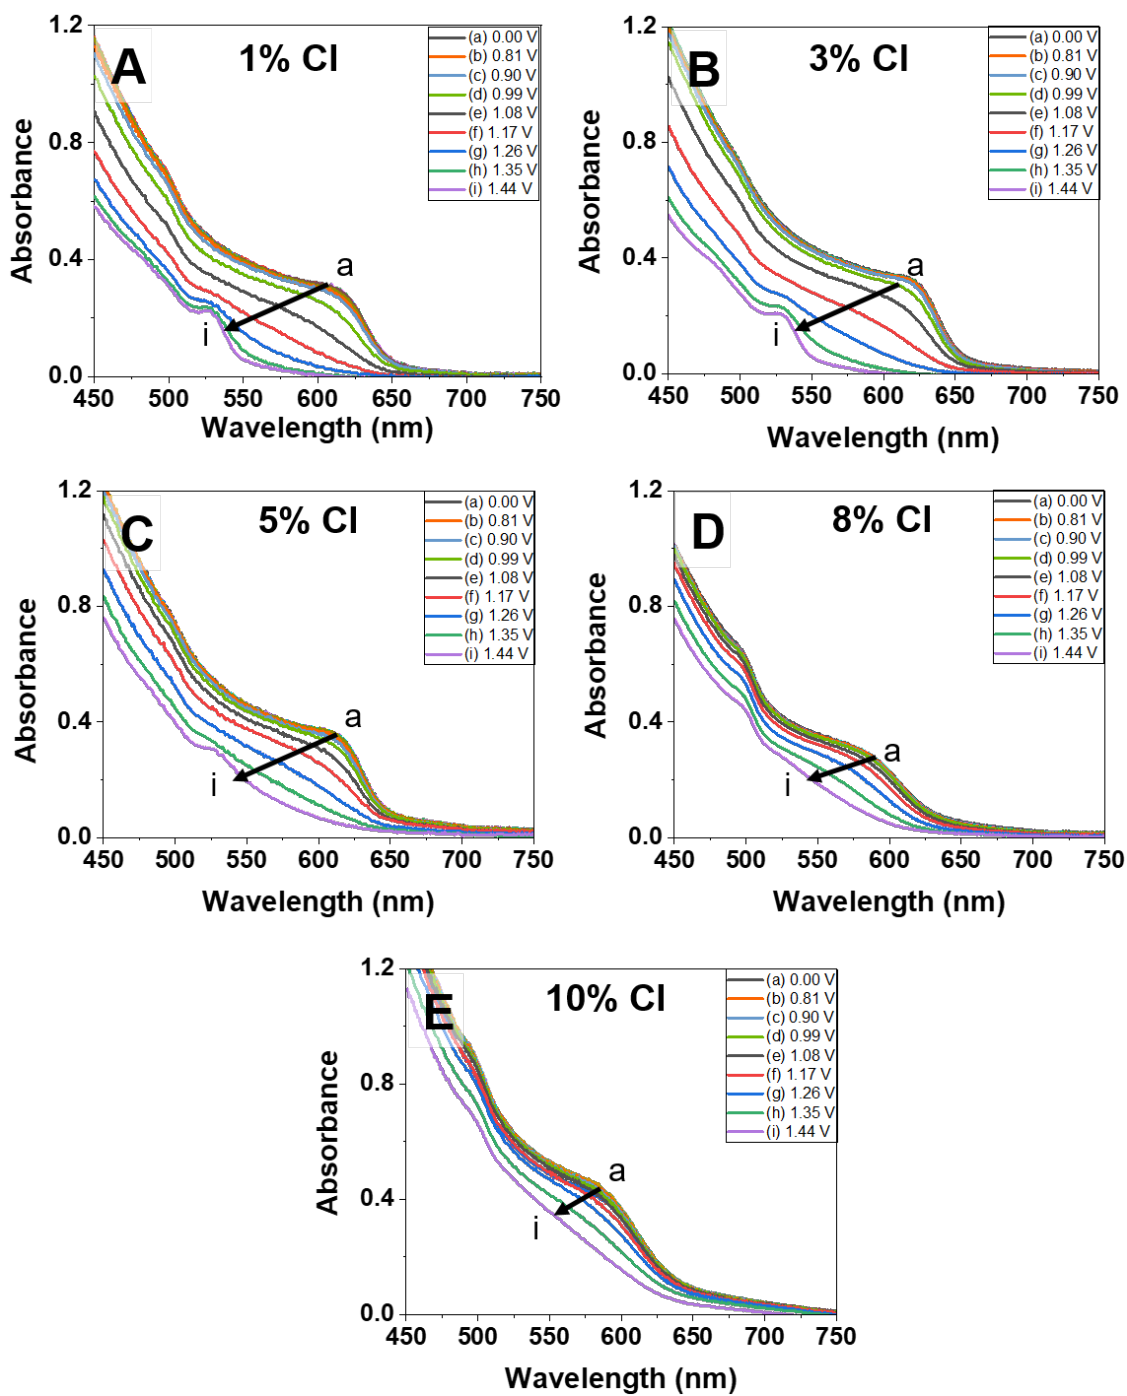

**Fig. S7** (A-D) Absorption spectra changes recorded during stepwise application of potential between 0 V and + 1.44 V (a-i) versus Ag/AgCl in 0.01 M Bu<sub>4</sub>NPF<sub>6</sub>/DCM electrolyte for the FTO/MAPb(Cl<sub>x</sub>Br<sub>0.5(1-x)</sub>I<sub>0.5(1-x)</sub>)<sub>3</sub> films with different Cl concentration of 1% Cl (A), 3 % Cl (B), 5% Cl (C), 8% Cl (D), and 10% Cl (E).



## References

1. Samu, G. F.; Balog, Á.; De Angelis, F.; Meggiolaro, D.; Kamat, P. V.; Janáky, C. Electrochemical Hole Injection Selectively Expels Iodide from Mixed Halide Perovskite Films. *J. Am. Chem. Soc.* **2019**, *141*, 10812–10820.
2. Dubose, J. T.; Kamat, P.V.; TiO<sub>2</sub>-Assisted Halide Ion Segregation in Mixed Halide Perovskite Films. *J. Am. Chem. Soc.* **2020**, *142*, 5362–5370.
3. Cho, J.; Kamat, P.V.; How Chloride Suppresses Photoinduced Phase Segregation in Mixed Halide Perovskites. *Chem. Mater.* **2020**, *32*, 6206–6212.
4. Samu, G. F.; Scheidt, R. A.; Kamat, P. V.; Janáky, C. Electrochemistry and Spectroelectrochemistry of Lead Halide Perovskite Films: Materials Science Aspects and Boundary Conditions. *Chem. Mater.* **2018**, *30*, 561–569.
